# Supplementary material for: Highly Effective Removal of Ofloxacin from Water with Copper-Doped ZIF-8
Source: MDPI journal article supplement (doi:10.3390/molecules27134312), 2022-07-05
Supplement: s1 [file s1]

# Supporting Information

## Highly Effective Removal of Ofloxacin from Water with Copper-Doped ZIF-8

Xiaowei Wang<sup>1</sup>, Yingjie Zhao<sup>1</sup>, Yiqi Sun<sup>2</sup>, Dahuan Liu<sup>1\*</sup>

<sup>1</sup> College of Chemical Engineering, Beijing University of Chemical Technology, Beijing 100029, PR China

<sup>2</sup> College of Materials Science and Engineering, Beijing University of Chemical Technology, Beijing 100029,  
PR China

\*Corresponding author. E-mail address: liudh@mail.buct.edu.cn (D.L.);

# Contents

- S1. PXRD Patterns, N<sub>2</sub> Adsorption-Desorption Isotherms, Contents of Cu, Zn, FT-IR Spectrum of Cu-ZIF-8s and Contents of Cu and Zn in Cu-ZIF-8s
- S2. Fitting Results of Kinetic Models
- S3. Adsorption Capacities of OFX by Different Adsorbents
- S4. Fitting Results of Adsorption Isotherms
- S5. SEM Images of Cu-ZIF-8-1 after Adsorption

# S1. PXRD Patterns, N<sub>2</sub> Adsorption-Desorption Isotherms, FT-IR Spectrum of Cu-ZIF-8s and Contents of Cu and Zn in Cu-ZIF-8s

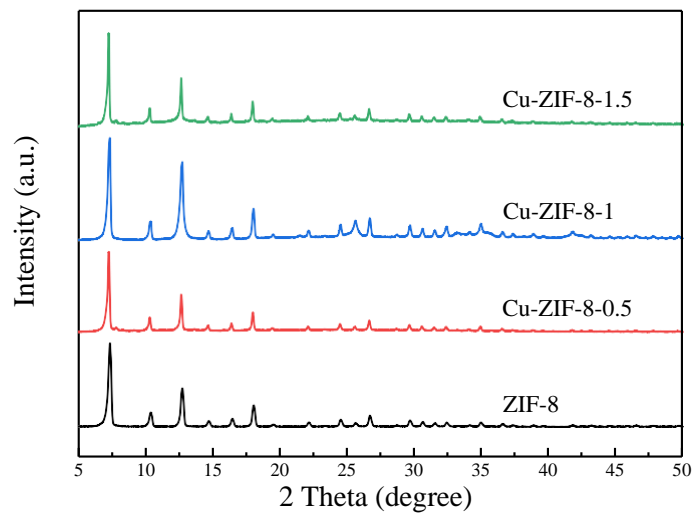

**Figure S1.** PXRD patterns of ZIF-8, Cu-ZIF-8-0.5, Cu-ZIF-8-1 and Cu-ZIF-8-1.5.

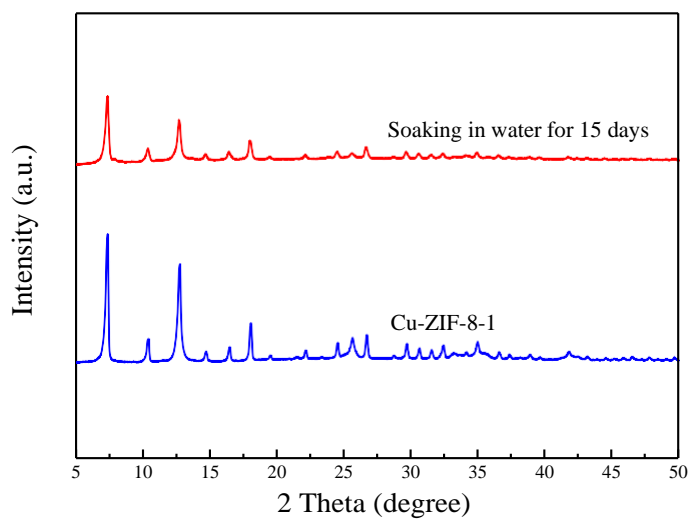

**Figure S2.** PXRD pattern of Cu-ZIF-8-1 after soaking in water for 15 days.

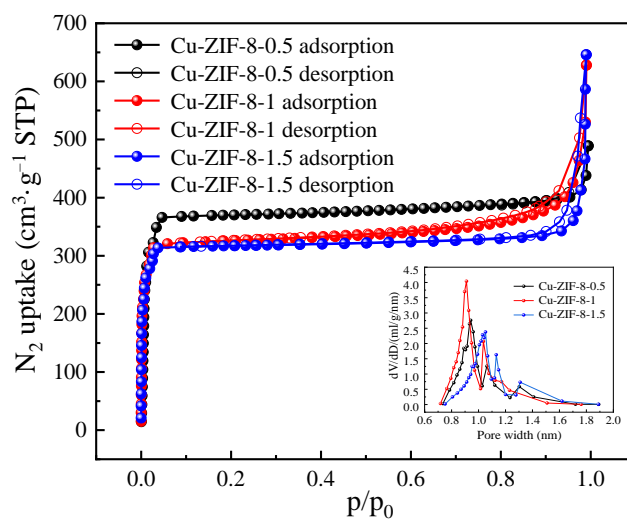

**Figure S3.** N<sub>2</sub> adsorption-desorption isotherms of Cu-ZIF-8-0.5, Cu-ZIF-8-1 and Cu-ZIF-8-1.5.

**Table S1.** Specific surface area, mesopore volume, micropore volume and pore size of samples.

| MOFs         | $S_{\text{Langmuir}}$ (m <sup>2</sup> ·g <sup>-1</sup> ) | $V_t$ (m <sup>3</sup> ·g <sup>-1</sup> ) | D (nm) |
|--------------|----------------------------------------------------------|------------------------------------------|--------|
| Cu-ZIF-8-0.5 | 1641.07                                                  | 0.6837                                   | 1.5641 |
| Cu-ZIF-8-1   | 1438.27                                                  | 0.7353                                   | 1.6124 |
| Cu-ZIF-8-1.5 | 1388.96                                                  | 0.7540                                   | 1.7239 |

**Table S2.** Contents of Cu and Zn in Cu-ZIF-8s.

| MOFs                | content of Cu (%) | content of Zn (%) | Cu:Zn    |
|---------------------|-------------------|-------------------|----------|
| <b>Cu-ZIF-8-0.5</b> | 3.633             | 24.671            | 1 : 6.79 |
| <b>Cu-ZIF-8-1</b>   | 6.889             | 20.731            | 1 : 3.01 |
| <b>Cu-ZIF-8-1.5</b> | 9.967             | 17.300            | 1 : 1.74 |

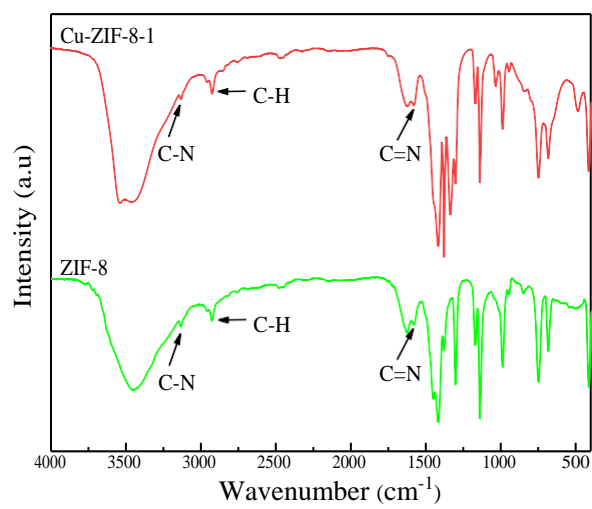

**Figure S4.** FT-IR spectrum of ZIF-8 and Cu-ZIF-8-1.

## S2. Fitting Results of Kinetic Models

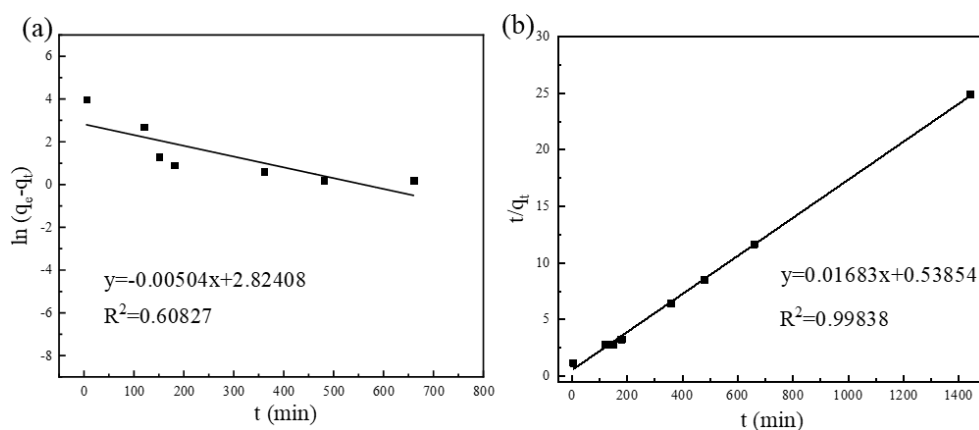

**Figure S5.** Fitting results of kinetic models on ZIF-8: Pseudo-first-order model (a); Pseudo-second-order model (b).

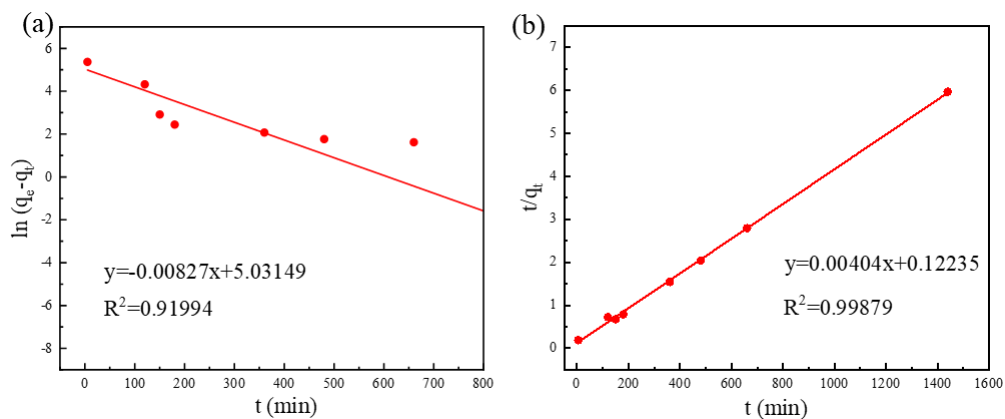

**Figure S6.** Fitting results of kinetic models on Cu-ZIF-8-1: Pseudo-first-order model (a); Pseudo-second-order model (b).

**Table S3.** Kinetics model parameters of OFX adsorbed on ZIF-8.

| MOF   | Pseudo-first-order model                            |                                 |        | Pseudo-second-order model                           |                                                                     |        |
|-------|-----------------------------------------------------|---------------------------------|--------|-----------------------------------------------------|---------------------------------------------------------------------|--------|
|       | $q_{e,cal} \text{ (mg} \cdot \text{g}^{-1}\text{)}$ | $k_1 \text{ (min}^{-1}\text{)}$ | $R^2$  | $q_{e,cal} \text{ (mg} \cdot \text{g}^{-1}\text{)}$ | $k_2 \text{ (g} \cdot \text{min}^{-1} \cdot \text{mg}^{-1}\text{)}$ | $R^2$  |
| ZIF-8 | 16.8454                                             | 0.0050                          | 0.6083 | 59.4177                                             | 0.0005                                                              | 0.9984 |

### S3. Adsorption Capacities of OFX by Different Adsorbents

**Table S4.** Adsorption capacities for the removal of OFX by different adsorbents

| Adsorbents                                  | T (°C)           | Capacity (mg·g <sup>-1</sup> ) | Refs.     |
|---------------------------------------------|------------------|--------------------------------|-----------|
| Cu-ZIF-8-1                                  | 30               | 599.96                         | This work |
| MIL-101(Cr)-SO <sub>3</sub> H               | 30               | 450.4                          | [1]       |
| HRP-CsGOn                                   | 35               | 378                            | [2]       |
| Mesoporous SiO <sub>2</sub>                 | 25               | 290.9                          | [3]       |
| Activated carbon cloth                      | 25               | 253                            | [4]       |
| CVL                                         | 55               | 160.81                         | [5]       |
| Activated carbon                            | 25               | 132                            | [6]       |
| DES-MUiO-66-NH <sub>2</sub>                 | 25               | 97.6                           | [7]       |
| Co-CNT/NPC 3/1                              | Room temperature | 78.42                          | [8]       |
| BNNSs                                       | 25               | 72.5                           | [9]       |
| NBC                                         | 25               | 54.054                         | [10]      |
| Halloysite clay                             | 35               | 44.7                           | [11]      |
| rGO-MoS <sub>2</sub>                        | 25               | 37.31                          | [12]      |
| DES-RHA                                     | 30               | 30.2                           | [13]      |
| Fe/Zn + H <sub>3</sub> PO <sub>4</sub> -SBC | 25               | 25.4                           | [14]      |
| Zn <sub>3</sub> (BTC) <sub>2</sub>          | Room temperature | 25.3                           | [15]      |
| nFe                                         | 30               | 12.8                           | [16]      |
| RHA                                         | 30               | 7.2                            | [17]      |
| Met-GO/SA                                   | 35               | 3.436                          | [18]      |
| GO/SA                                       | 35               | 1.798                          | [18]      |

## S4. Fitting Results of Adsorption Isotherms

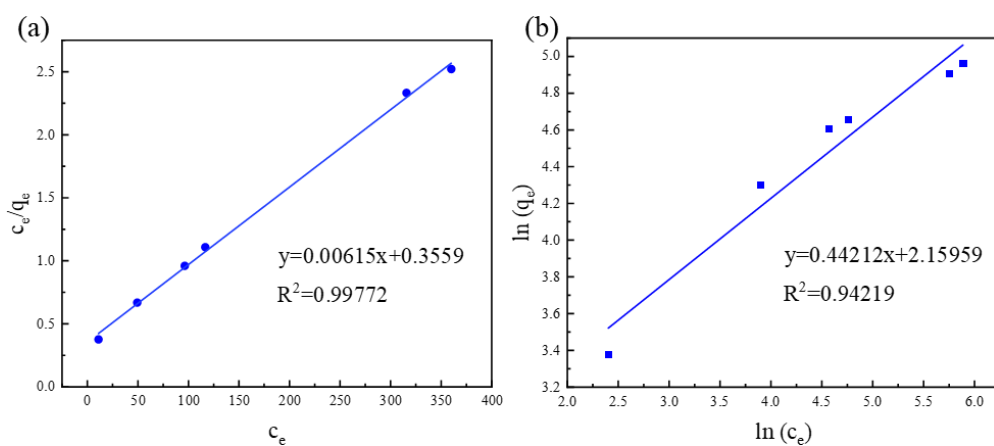

**Figure S7.** Fitting results of adsorption isotherms on ZIF-8: Langmuir model (a); Freundlich model (b).

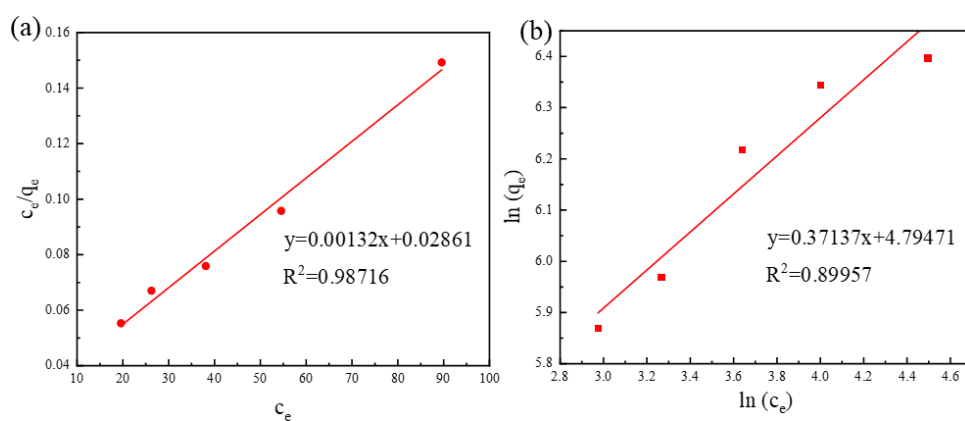

**Figure S8.** Fitting results of adsorption isotherms on Cu-ZIF-8-1: Langmuir model (a); Freundlich model (b).

**Table S5.** Model parameters for OFX adsorbed on the ZIF-8.

| MOF   | Langmuir isotherm model             |                                    |        | Freundlich isotherm model                                                 |                                                           |        |
|-------|-------------------------------------|------------------------------------|--------|---------------------------------------------------------------------------|-----------------------------------------------------------|--------|
|       | $q_m$                               | $K_L$                              | $R^2$  | $K_F$                                                                     | $1/n$                                                     | $R^2$  |
|       | ( $\text{mg} \cdot \text{g}^{-1}$ ) | ( $\text{L} \cdot \text{g}^{-1}$ ) |        | ( $(\text{L} \cdot \text{mg}^{-1})^{1/n} \text{mg} \cdot \text{g}^{-1}$ ) | ( $\text{g} \cdot \text{min}^{-1} \cdot \text{mg}^{-1}$ ) |        |
| ZIF-8 | 162.6016                            | 0.0173                             | 0.9977 | 8.6676                                                                    | 0.4421                                                    | 0.9422 |



## S5. SEM Images of Cu-ZIF-8-1 after Adsorption

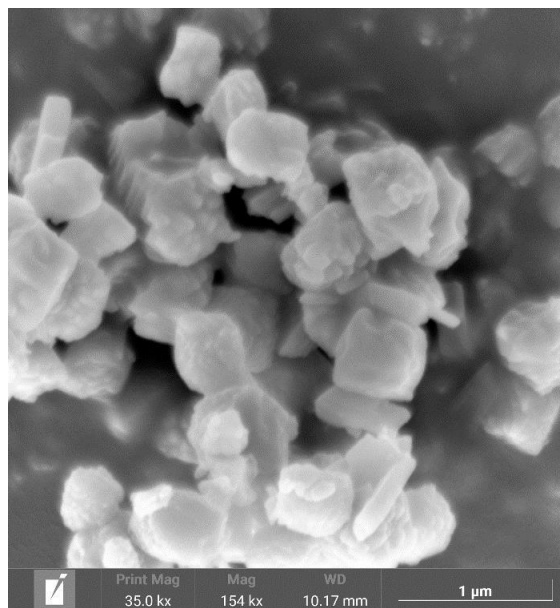

**Figure S9.** SEM images of Cu-ZIF-8-1 after adsorption ( $c_0 = 200 \text{ mg} \cdot \text{L}^{-1}$ ).

## References

1. Guo, X.; Kang, C.; Huang, H.; Chang, Y.; Zhong, C. Exploration of functional MOFs for efficient removal of fluoroquinolone antibiotics from water. *Micropor. Mesopor. Mater.* **2019**, 286, 84-91, doi:10.1016/j.micromeso.2019.05.025.
2. Suri, A.; Khandegar, V.; Kaur, P.J. Ofloxacin exclusion using novel HRP immobilized chitosan cross-link with graphene-oxide nanocomposite. *Groundw. Sustain. Dev.* **2021**, 12, 100515, doi:10.1016/j.gsd.2020.100515.
3. Goyne, K.W.; Chorover, J.; Kubicki, J.D.; Zimmerman, A.R.; Brantley, S.L. Sorption of the antibiotic ofloxacin to mesoporous and nonporous alumina and silica. *J. Colloid Interface Sci.* **2005**, 283, 160-170, doi:10.1016/j.jcis.2004.08.150.
4. Delpeux-Ouldriane, S.; Gineys, M.; Cohaut, N.; Béguin, F.; Masson, S.; Reinert, L.; Duclaux, L. Adsorption and Desorption of Emerging Water Contaminants on Activated Carbon Fabrics. *Int. J. Environ. Pollut Remediat.* **2016**, 4, 1-6, doi:10.11159/ijepr.2016.001.
5. Antonelli, R.; Martins, F.R.; Malpass, G.R.P.; da Silva, M.G.C.; Vieira, M.G.A. Ofloxacin adsorption by calcined Verde-lodo bentonite clay: Batch and fixed bed system evaluation. *J. Mol. Liq.* **2020**, 315, 113718, doi:10.1016/j.molliq.2020.113718.
6. Kong, Q.; He, X.; Shu, L.; Miao, M.-s. Ofloxacin adsorption by activated carbon derived from luffa sponge: Kinetic, isotherm, and thermodynamic analyses. *Process Saf. Environ. Prot.* **2017**, 112, 254-264, doi:10.1016/j.psep.2017.05.011.
7. Wei X, Wang Y, Chen J, et al. Adsorption of pharmaceuticals and personal care products by deep eutectic solvents-regulated magnetic metal-organic framework adsorbents: Performance and mechanism. *Chem. Eng. J.* **2020**, 392, 124808. doi:10.1016/j.cej.2020.124808.
8. Liang, Y.; Zhang, Q.; Li, S.; Fei, J.; Zhou, J.; Shan, S.; Li, Z.; Li, H.; Chen, S. Highly efficient removal of

- quinolones by using the easily reusable MOF derived-carbon. *J. Hazard. Mater.* **2022**, 423, 127181, doi:10.1016/j.jhazmat.2021.127181.
9. Bangari, R.S.; Sinha, N. Adsorption of tetracycline, ofloxacin and cephalixin antibiotics on boron nitride nanosheets from aqueous solution. *J. Mol. Liq.* **2019**, 111376, 293, doi:10.1016/j.molliq.2019.111376.
  10. Tang, Y.; Li, Y.; Zhan, L.; Wu, D.; Zhang, S.; Pang, R.; Xie, B. Removal of emerging contaminants (bisphenol A and antibiotics) from kitchen wastewater by alkali-modified biochar. *Sci. Total Environ.* **2022**, 805, 150158, doi:10.1016/j.scitotenv.2021.150158.
  11. Wang, Q.; Zhang, J.; Zheng, Y.; Wang, A. Adsorption and release of ofloxacin from acid- and heat-treated halloysite. *Colloids Surf. B Biointerfaces.* **2014**, 113, 51-58, doi:10.1016/j.colsurfb.2013.08.036.
  12. Jaswal, A.; Kaur, M.; Singh, S.; Kansal, S.K.; Umar, A.; Garoufalidis, C.S.; Baskoutas, S. Adsorptive removal of antibiotic ofloxacin in aqueous phase using rGO-MoS<sub>2</sub> heterostructure. *J. Hazard. Mater.* **2021**, 417, 125982, doi:10.1016/j.jhazmat.2021.125982.
  13. Kaur, G.; Singh, N.; Rajor, A.; Kushwaha, J.P. Deep eutectic solvent functionalized rice husk ash for effective adsorption of ofloxacin from aqueous environment. *J. Contam. Hydrol.* **2021**, 242, 103847, doi:10.1016/j.jconhyd.2021.103847.
  14. Ma, Y.; Li, P.; Yang, L.; Wu, L.; He, L.; Gao, F.; Qi, X.; Zhang, Z. Iron/zinc and phosphoric acid modified sludge biochar as an efficient adsorbent for fluoroquinolones antibiotics removal. *Ecotox. Environ. Saf.* **2020**, 196, 110550, doi:10.1016/j.ecoenv.2020.110550.
  15. Capsoni, D.; Guerra, G.; Puscalau, C.; Maraschi, F.; Bruni, G.; Monteforte, F.; Profumo, A.; Sturini, M. Zinc Based Metal-Organic Frameworks as Ofloxacin Adsorbents in Polluted Waters: ZIF-8 vs. Zn<sub>3</sub>(BTC)<sub>2</sub>. *Int. J. Environ. Res. Public Health* **2021**, 18, 1433, doi:10.3390/ijerph18041433.
  16. Weng X, Cai W, Owens G, et al. Magnetic iron nanoparticles calcined from biosynthesis for fluoroquinolone antibiotic removal from wastewater. *J. Clean. Prod.* **2021**, 319: 128734. doi:10.1016/j.jclepro.2021.128734.

17. Kaur, G.; Singh, N.; Rajor, A. Ofloxacin adsorptive interaction with rice husk ash: Parametric and exhausted adsorbent disposability study. *J. Contam. Hydrol.* **2021**, 236, 103737, doi:10.1016/j.jconhyd.2020.103737.
18. Yadav, S.; Asthana, A.; Singh, A.K.; Chakraborty, R.; Vidya, S.S.; Singh, A.; Carabineiro, S.A.C. Methionine-Functionalized Graphene Oxide/Sodium Alginate Bio-Polymer Nanocomposite Hydrogel Beads: Synthesis, Isotherm and Kinetic Studies for an Adsorptive Removal of Fluoroquinolone Antibiotics. *Nanomaterials-Basel* **2021**, 11, 568, doi:10.3390/nano11030568.
